# Supplementary material
Source: PubMed Central journal article supplement (PMC3079236)
Supplement: NIHMS251687-supplement-1_si_001.pdf [file NIHMS251687-supplement-1_si_001.pdf]

## Supporting Information

### Simultaneous De Novo Identification of Molecules in Chemical Mixtures by Doubly Indirect Covariance NMR Spectroscopy

Fengli Zhang, Lei Bruschiweiler-Li and Rafael Brüschiweiler

*Complete references 1 and 2:*

[1] Ulrich, E. L.; Akutsu, H.; Doreleijers, J. F.; Harano, Y.; Ioannidis, Y. E.; Lin, J.; Livny, M.; Mading, S.; Maziuk, D.; Miller, Z.; Nakatani, E.; Schulte, C. F.; Tolmie, D. E.; Wenger, R. K.; Yao, H. Y.; Markley, J. L., *Nucleic Acids Res.* **2008**, *36*, D402-D408.

[2] Wishart, D. S.; Tzur, D.; Knox, C.; Eisner, R.; Guo, A. C.; Young, N.; Cheng, D.; Jewell, K.; Arndt, D.; Sawhney, S.; Fung, C.; Nikolai, L.; Lewis, M.; Coutouly, M. A.; Forsythe, I.; Tang, P.; Shrivastava, S.; Jeroncic, K.; Stothard, P.; Amegbey, G.; Block, D.; Hau, D. D.; Wagner, J.; Miniaci, J.; Clements, M.; Gebremedhin, M.; Guo, N.; Zhang, Y.; Duggan, G. E.; MacInnis, G. D.; Weljie, A. M.; Dowlatabadi, R.; Bamforth, F.; Clive, D.; Greiner, R.; Li, L.; Marrie, T.; Sykes, B. D.; Vogel, H. J.; Querengesser, L., *Nucleic Acids Res.* **2007**, *35*, D521-D526.
